# Supplementary material for: Comorbidity and healthcare utilisation in persons with incident systemic lupus erythematosus followed for 3 years after diagnosis: analysis of a claims data cohort
Source: PubMed Central journal article supplement — Lupus Sci Med. 2021 Aug 25;8(1):e000526. doi: 10.1136/lupus-2021-000526 (PMC8388287; doi:10.1136/lupus-2021-000526), 2021-08-25
Supplement: lupus-2021-000526supp001.pdf [file lupus-2021-000526supp001.pdf]

**International classification of diseases (ICD) 10 and anatomical therapeutic chemical classification (ATC) codes for all conditions and medications considered**

| <b>Organ manifestations</b>        |                                          | <b>ICD-10 Code</b>                                |
|------------------------------------|------------------------------------------|---------------------------------------------------|
|                                    | Glomerulonephritis                       | N08.5                                             |
|                                    | Pericarditis                             | I32.8                                             |
|                                    | Endocarditis                             | I39                                               |
|                                    | Cerebral Arteriitis                      | I68.2*                                            |
|                                    | Dementia                                 | F02.8*                                            |
|                                    | Encephalitis                             | G05.8*                                            |
|                                    | Polyneuropathy                           | G60-G64                                           |
|                                    | Myopathy                                 | G73.7*                                            |
|                                    | Lung Involvement                         | J99.1*                                            |
|                                    | Raynaud's Syndrome                       | I73.0                                             |
|                                    | Antiphospholipid-Syndrome                | D68.6                                             |
| <b>Medication-Treatment of SLE</b> |                                          | <b>ATC-Code</b>                                   |
|                                    | Glucocorticoids                          | H02AB01-07 H02BX                                  |
|                                    | (Hydroxy)Chloroquine                     | P01BA02 P01BA01                                   |
|                                    | Azathioprine                             | L04AX01                                           |
|                                    | Methotrexate                             | L01BA01 L04AX03 M01CX01                           |
|                                    | Mycofenolat Mofetile                     | L04AA06                                           |
|                                    | Cyclosporine                             | L04AD01                                           |
|                                    | Leflunomide                              | L04AA13                                           |
|                                    | Belimumab                                | L04AA26                                           |
|                                    | Rituximab                                | L01XC02                                           |
|                                    | Abatacept                                | L04AA24                                           |
| <b>Comorbidities</b>               |                                          | <b>ICD-10 Code</b>                                |
|                                    | Hypertension                             | I10-13, I15                                       |
|                                    | Hyperlipidemia                           | E78                                               |
|                                    | Obesity                                  | E66                                               |
|                                    | Cerebrovascular Diseases                 | I60-69                                            |
|                                    | Thrombosis                               | I80-82                                            |
|                                    | Renal Disease                            | N08,N18-19                                        |
|                                    | Chronic Obstructive Pulmonary Disease    | J27.8-9, J40-47, J60-67, J68.4, J70.1, J70.3      |
|                                    | Hypothyroidism                           | E00-03, E89.0                                     |
|                                    | Osteoarthritis                           | M15-17                                            |
|                                    | Osteoporosis                             | M80-82                                            |
|                                    | Osteoporosis with pathologic fracture    | M80                                               |
|                                    | Osteoporosis without pathologic fracture | M81-82                                            |
|                                    | Fibromyalgia                             | M79.7                                             |
|                                    | Depression                               | F20.4,F31.3-5, F32, F33, F34.1, F41.2, F43.2      |
|                                    | Polyneuropathy                           | G60-G64                                           |
|                                    | Solid Tumour                             | C00-C26, C30-34, C37-41, C43, C45-58, C60-76, C97 |
|                                    | Metastatic Cancer                        | C77-80                                            |

| Medication-Treatment of Comorbidities |                                                                      | ATC-Code |
|---------------------------------------|----------------------------------------------------------------------|----------|
|                                       | Cardiovascular therapy (antihypertensives, beta-blockers, diuretics) | C02-C09  |
|                                       | Lipid lowering therapies                                             | C10      |
|                                       | Osteoporosis therapies                                               | M05B     |
|                                       | Antidepressants                                                      | N96A     |
|                                       | Non-steroidal anti-rheumatic drugs                                   | M01A     |
|                                       | Other analgesics                                                     | N02B     |
|                                       | Opioids                                                              | N02A     |
